# Supplementary material for: Syntheses, characterization and properties of two new dodeca-niobates presenting unprecedented features
Source: Royal Society of Chemistry journal article supplement (doi:10.1039/d0dt00953a), 2020-01-01
Supplement: d0dt00953a1.pdf [file d0dt00953a1.pdf]

## Supporting information

Table 1. BVS results of the independent Nb and V atoms in compounds **1** and **2**.

| Compound <b>1</b>                                                                                                                                                                                                                                                   |      |
|---------------------------------------------------------------------------------------------------------------------------------------------------------------------------------------------------------------------------------------------------------------------|------|
| Nb(1)                                                                                                                                                                                                                                                               | 5.05 |
| Nb(2)                                                                                                                                                                                                                                                               | 5.19 |
| Nb(3)                                                                                                                                                                                                                                                               | 4.92 |
| Nb(4)                                                                                                                                                                                                                                                               | 4.25 |
| Compound <b>2</b>                                                                                                                                                                                                                                                   |      |
| Nb(1)                                                                                                                                                                                                                                                               | 5.00 |
| Nb(2)                                                                                                                                                                                                                                                               | 4.93 |
| Nb(3)                                                                                                                                                                                                                                                               | 4.94 |
| Nb(4)                                                                                                                                                                                                                                                               | 4.99 |
| Nb(5)                                                                                                                                                                                                                                                               | 4.89 |
| Nb(6)                                                                                                                                                                                                                                                               | 4.98 |
| Nb(7)                                                                                                                                                                                                                                                               | 4.96 |
| Nb(8)                                                                                                                                                                                                                                                               | 4.97 |
| Nb(9)                                                                                                                                                                                                                                                               | 4.93 |
| Nb(10)                                                                                                                                                                                                                                                              | 4.92 |
| Nb(11)                                                                                                                                                                                                                                                              | 4.91 |
| Nb(12)                                                                                                                                                                                                                                                              | 4.93 |
| V(1)                                                                                                                                                                                                                                                                | 5.24 |
| V(2)                                                                                                                                                                                                                                                                | 5.12 |
| V(3)                                                                                                                                                                                                                                                                | 4.54 |
| The equations used for the BVS of Nb are $s=\exp[(1.911-r)/0.37]$ , while the equations used for the BVS of V are $s=\exp[(1.803-r)/0.37]$ . <sup>1</sup> The BVS of V(3) is relatively lower than those of V(1) and V(2), which is caused by the disorder of V(3). |      |

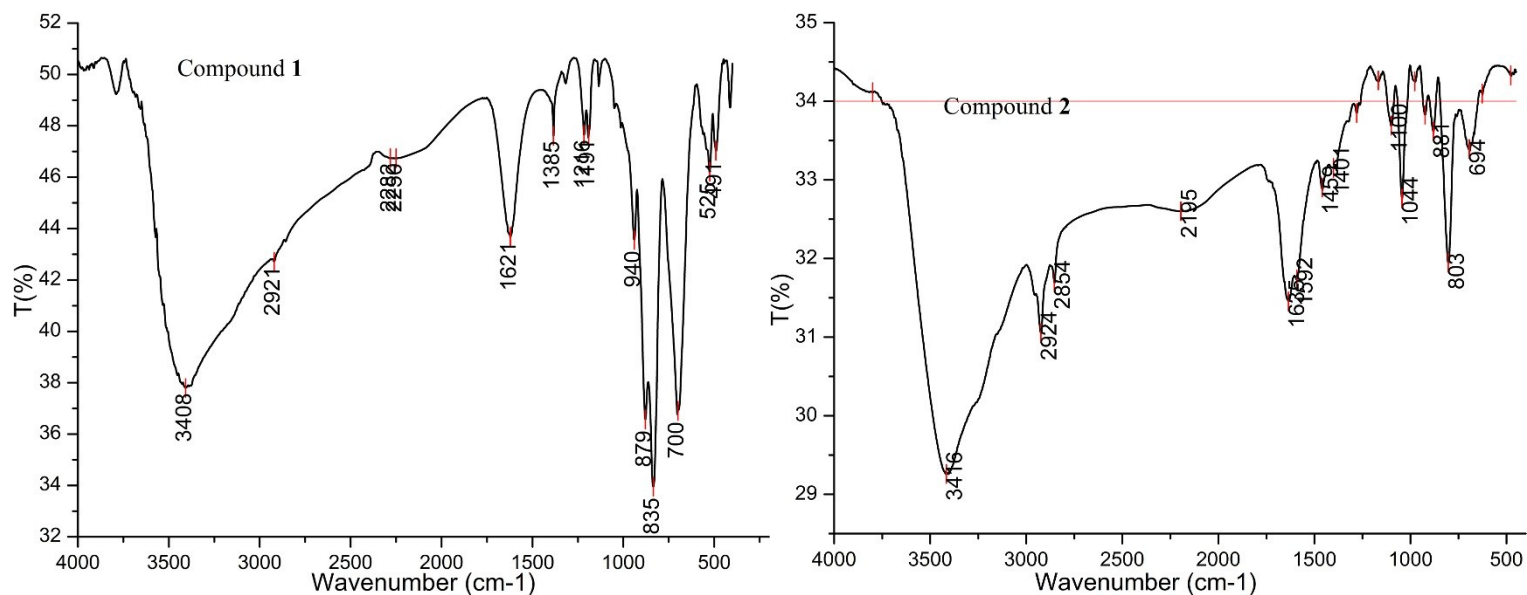

Fig. s1. IR spectra of compounds **1** and **2**.

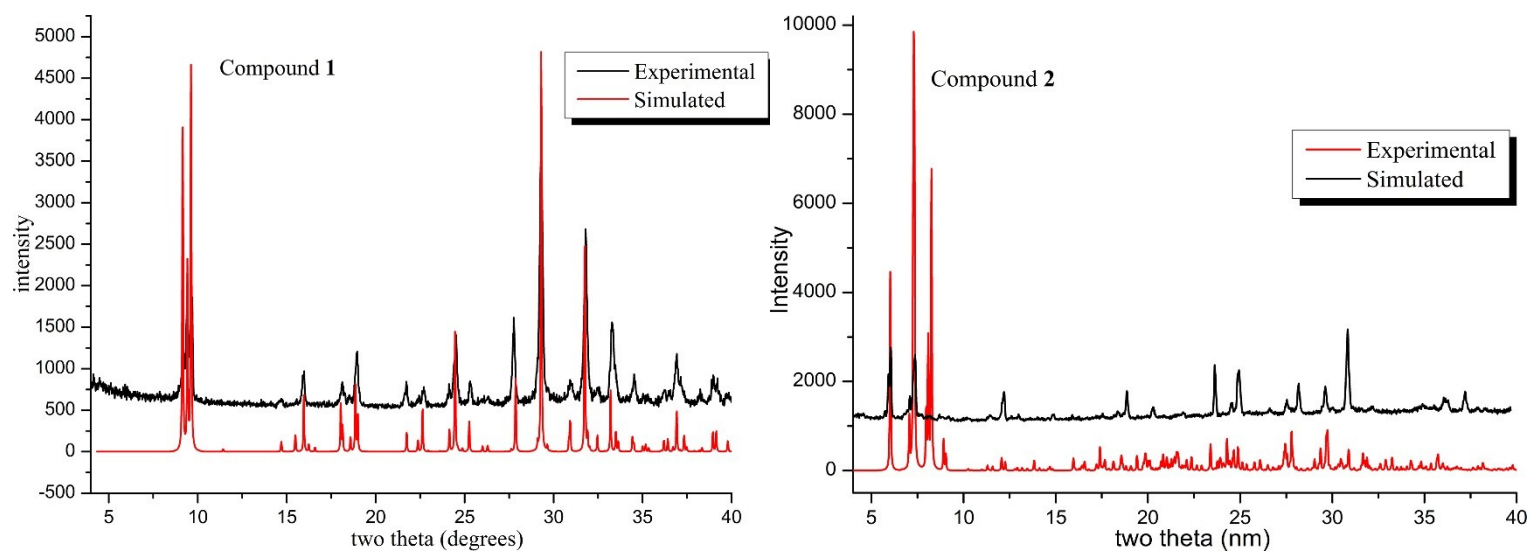

Fig. s2. Experimental and simulated XRD patterns of compounds **1** and **2**.

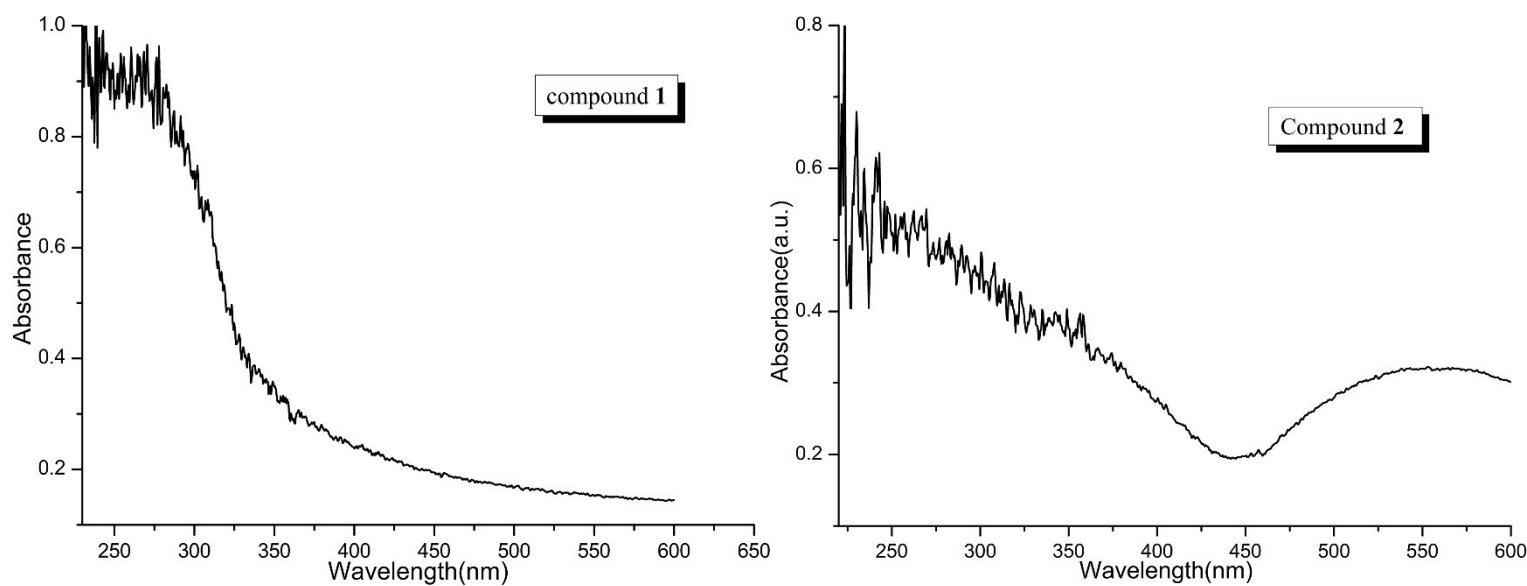

Fig. s3. Solid state UV-Vis spectra of compounds **1** and **2**.

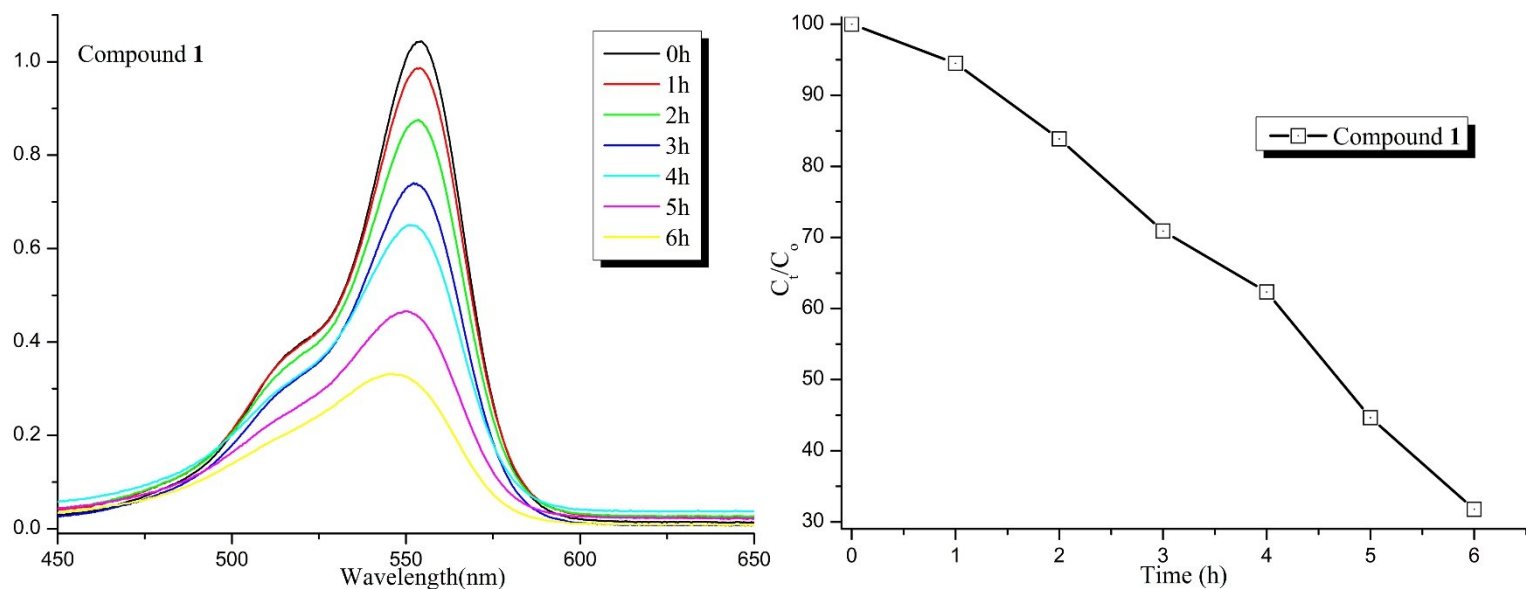

Fig. s4 the RhB photocatalytic degradation performance over compound 1.

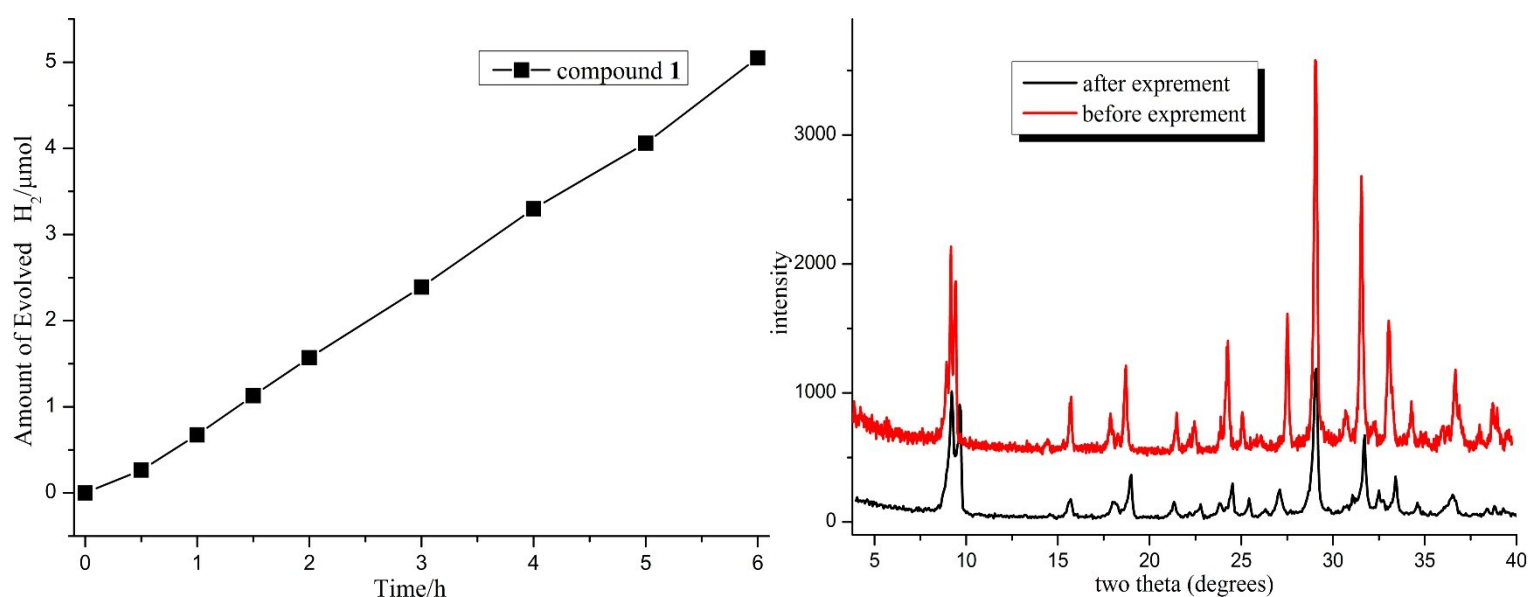

Fig. s5. (a) Time course of H<sub>2</sub> evolution from 50 mg of 0.1% Pt loaded photocatalyst compound 1 under 300 W Xe-lamp irradiation in 100 mL of aqueous solution containing 10 vol% methanol solution. (b) Time course of the total H<sub>2</sub> evolution in 6 hours.

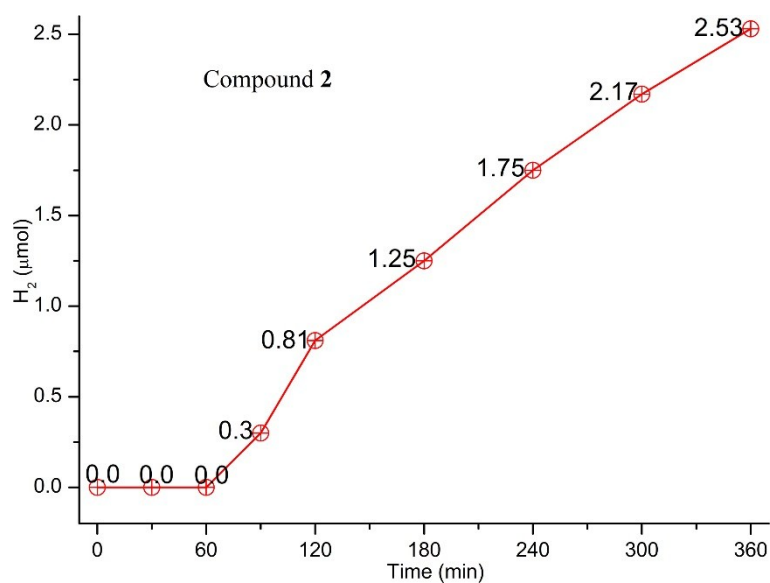

Fig. s6 Fig. 2 H<sub>2</sub>-evolution upon Xe-lamp irradiation of 10mg of 0.1% Pt loaded PONb catalysts in 100 mL MeOH-H<sub>2</sub>O solution (10% v/v).

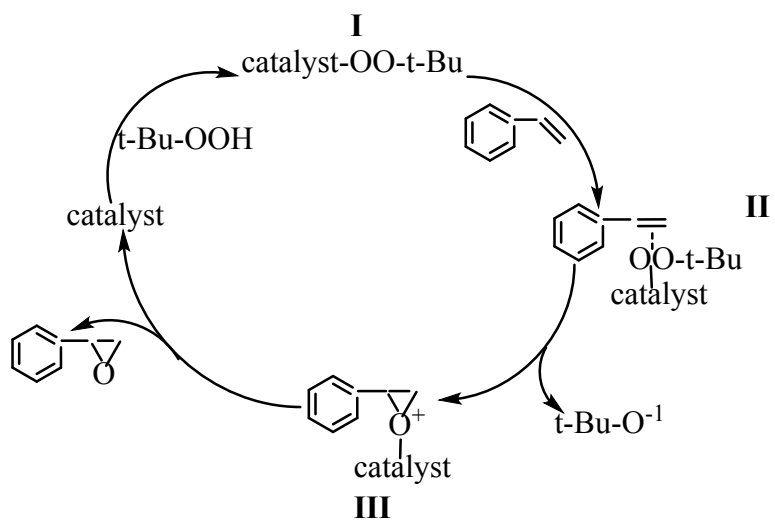

Scheme s1. Schematic illustration of the proposed reaction mechanism for the styrene oxidation reaction.

References:

1. I. D. Brown and D. Altermatt, *Acta. Cryst.*, 1985, **B41**, 244.
